# Supplementary material for: Comparative transcriptomic analysis reveals the regulatory mechanism of the gibberellic acid pathway of Tartary buckwheat (Fagopyrum tataricum (L.) Gaertn.) dwarf mutants
Source: PubMed Central journal article supplement (PMC8086092; doi:10.1186/s12870-021-02978-8), 2021-04-30
Supplement: 12870_2021_2978_MOESM1_ESM.pdf [file 12870_2021_2978_MOESM1_ESM.pdf]

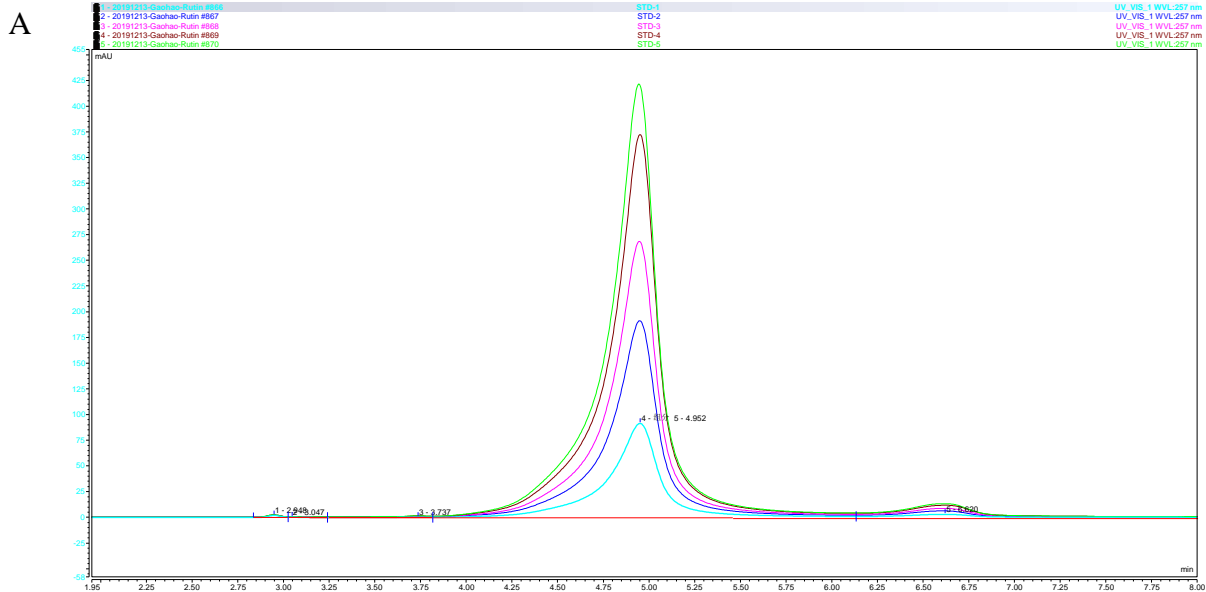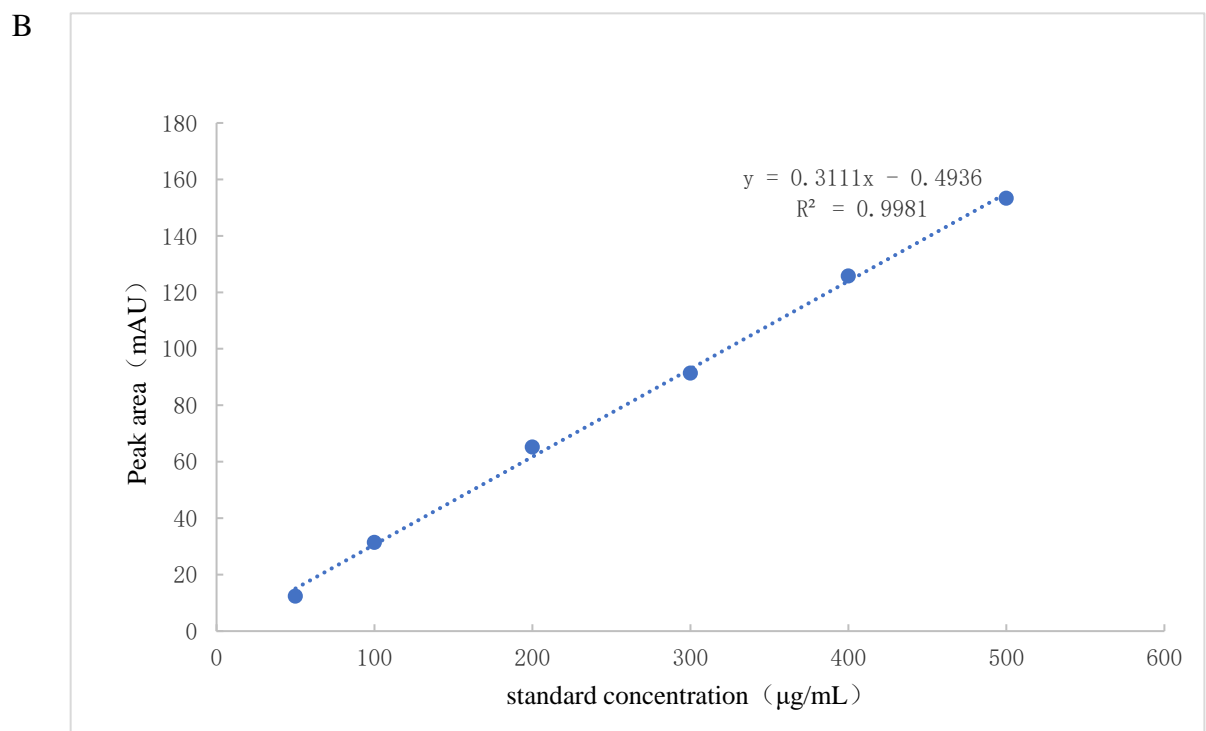

Fig. S1 Peak area (A) and standard curve (B) of rutin, as determined via HPLC.
